# Supplementary material for: A comparative analysis of intravenous infusion methods for low-resource environments
Source: Front Med (Lausanne). 2024 Feb 20;11:1326144. doi: 10.3389/fmed.2024.1326144 (PMC10912611; doi:10.3389/fmed.2024.1326144)
Supplement: Supplementary file 1 [file Table_1.XLSX]

## Sheet: Sheet1
Country	Method applicable to	Item	Unit	Cost per unit ($)	Year	Source(s)	Number of units per item per patient	Cost per item	Annual interest rate	Calculation interest	Years until 2022	Adjusted cost per patient (2022)
Senegal	1	Nurse wages	per hour	5	2022	Clinique Madeleine, Clinique Casahours	0.06	0.3	0.0475	1.00048	0	0.3
Senegal	2	Nurse wages	per hour	5	2022	Clinique Madeleine, Clinique Casahours	0.02	0.1	0.0475	1.00048	0	0.1
Senegal	3	Nurse wages	per hour	5	2022	Clinique Madeleine, Clinique Casahours	0.03	0.15	0.0475	1.00048	0	0.15
Senegal	4	Nurse wages	per hour	5	2022	Clinique Madeleine, Clinique Casahours	0.0977	0.4885	0.0475	1.00048	0	0.4885
Senegal	5	Nurse wages	per hour	5	2022	Clinique Madeleine, Clinique Casahours	0.101	0.505	0.0475	1.00048	0	0.505
Senegal	1	Physician wages	per hour	25	2023	Les pharamcies et al Pharmacie nationale d'approvisionement	0.06	1.5	0.0475	1.00048	-1	1.49929
Senegal	2	Physician wages	per hour	25	2023	Les pharamcies et al Pharmacie nationale d'approvisionement	0.02	0.5	0.0475	1.00048	-1	0.499763
Senegal	3	Physician wages	per hour	25	2023	Les pharamcies et al Pharmacie nationale d'approvisionement	0.03	0.75	0.0475	1.00048	-1	0.749644
Senegal	4	Physician wages	per hour	25	2023	Les pharamcies et al Pharmacie nationale d'approvisionement	0.0977	2.4425	0.0475	1.00048	-1	2.44134
Senegal	5	Physician wages	per hour	25	2023	Les pharamcies et al Pharmacie nationale d'approvisionement	0.101	2.525	0.0475	1.00048	-1	2.5238
Senegal	1	Equipment	per use	5	2023	N/A	1	5	0.0475	1.00048	-1	4.99763
Senegal	2	Equipment - Manual Flow Reg	per use	3.99	2023	Buymedical.com	1	3.99	0.0475	1.00048	-1	3.98811
Senegal	3	Equipment - Infusion Pump	per use	2000	2023	diamedicalusa.com	1	2000	0.0475	1.00048	-1	1999.05
Senegal	4	Equipment - DripAssist	per use	300	2023	shiftlabs.com	1	300	0.0475	1.00048	-1	299.858
Senegal	5	Equipment - DripAssist + Manual Flow Regulator	per use	304	2023	shiftlabs.com	1	304	0.0475	1.00048	-1	303.856
Senegal	1	Sedatives - Midazolam	per vial	0.47	2022	Pharmacie nationale d'approvisionnement, Dakar, Senegal	1	0.47	0.0475	1.00048	0	0.47
Senegal	1	Sedatives - Fentanyl	per 1ml vial	3	2022	Pharmacie nationale d'approvisionnement, Dakar, Senegal	1	3	0.0475	1.00048	0	3
Senegal	2	Sedatives - Midazolam	per vial	0.47	2022	Pharmacie nationale d'approvisionnement, Dakar, Senegal	1	0.47	0.0475	1.00048	0	0.47
Senegal	2	Sedatives - Fentanyl	per vial	3	2022	Pharmacie nationale d'approvisionnement, Dakar, Senegal	1	3	0.0475	1.00048	0	3
Senegal	3	Sedatives - Midazolam	per vial	0.47	2022	Pharmacie nationale d'approvisionnement, Dakar, Senegal	1	0.47	0.0475	1.00048	0	0.47
Senegal	3	Sedatives - Fentanyl	per vial	3	2022	Pharmacie nationale d'approvisionnement, Dakar, Senegal	1	3	0.0475	1.00048	0	3
Senegal	4	Sedatives - Midazolam	per vial	0.47	2022	Pharmacie nationale d'approvisionnement, Dakar, Senegal	1	0.47	0.0475	1.00048	0	0.47
Senegal	4	Sedatives - Fentanyl	per vial	3	2022	Pharmacie nationale d'approvisionnement, Dakar, Senegal	1	3	0.0475	1.00048	0	3
Senegal	5	Sedatives - Midazolam	per vial	0.47	2022	Pharmacie nationale d'approvisionnement, Dakar, Senegal	1	0.47	0.0475	1.00048	0	0.47
Senegal	5	Sedatives - Fentanyl	per vial	3	2022	Pharmacie nationale d'approvisionnement, Dakar, Senegal	1	3	0.0475	1.00048	0	3
Senegal	1	ICU Stay	per day	55	2022	Madeleine Clinique in Dakar Senegal	7.3	401.5	0.0475	1.00048	0	401.5
Senegal	2	ICU Stay	per day	55	2022	Madeleine Clinique in Dakar Senegal	7.3	401.5	0.0475	1.00048	0	401.5
Senegal	3	ICU Stay	per day	55	2022	Madeleine Clinique in Dakar Senegal	7.3	401.5	0.0475	1.00048	0	401.5
Senegal	4	ICU Stay	per day	55	2022	Madeleine Clinique in Dakar Senegal	7.3	401.5	0.0475	1.00048	0	401.5
Senegal	5	ICU Stay	per day	55	2022	Madeleine Clinique in Dakar Senegal	7.3	401.5	0.0475	1.00048	0	401.5
India	1	Nurse wages	per hour	5.32	2022	Payscale.com (2022)	0.06	0.3192	0.065	1.00065	0	0.3192
India	2	Nurse wages	per hour	5.32	2022	Payscale.com (2022)	0.02	0.1064	0.065	1.00065	0	0.1064
India	3	Nurse wages	per hour	5.32	2022	Payscale.com (2022)	0.03	0.1596	0.065	1.00065	0	0.1596
India	4	Nurse wages	per hour	5.32	2022	Payscale.com (2022)	0.0977	0.519764	0.065	1.00065	0	0.519764
India	5	Nurse wages	per hour	5.32	2022	Payscale.com (2022)	0.101	0.53732	0.065	1.00065	0	0.53732
India	1	Physician wage	per hour	14.01	2022	Payscale.com (2022)	0.06	0.8406	0.065	1.00065	0	0.8406
India	2	Physician wage	per hour	14.01	2022	Payscale.com (2022)	0.02	0.2802	0.065	1.00065	0	0.2802
India	3	Physician wage	per hour	14.01	2022	Payscale.com (2022)	0.03	0.4203	0.065	1.00065	0	0.4203
India	4	Physician wage	per hour	14.01	2022	Payscale.com (2022)	0.0977	1.36878	0.065	1.00065	0	1.36878
India	5	Physician wage	per hour	14.01	2022	Payscale.com (2022)	0.101	1.41501	0.065	1.00065	0	1.41501
India	1	Sedatives - Midazolam	vial	0.35	2022		1	0.35	0.065	1.00065	0	0.35
India	1	Sedatives - Fentanyl	100 mcg ampule	0.45	2022		1	0.45	0.065	1.00065	0	0.45
India	2	Sedatives - Midazolam		0.35	2022		1	0.35	0.065	1.00065	0	0.35
India	2	Sedatives - Fentayl	100 mcg ampule	0.45	2022		1	0.45	0.065	1.00065	0	0.45
India	3	Sedatives - Midazolam		0.35	2022		1	0.35	0.065	1.00065	0	0.35
India	3	Sedatives - Fentanyl	100 mcg ampule	0.45	2022		1	0.45	0.065	1.00065	0	0.45
India	4	Sedatives - Midazolam		0.35	2022		1	0.35	0.065	1.00065	0	0.35
India	4	Sedatives - Fentanyl	100 mcg ampule	0.45	2022		1	0.45	0.065	1.00065	0	0.45
India	5	Sedatives - Midazolam		0.35	2022		1	0.35	0.065	1.00065	0	0.35
India	5	Sedatives - Fentanyl	100 mcg ampule	0.45	2022		1	0.45	0.065	1.00065	0	0.45
India	1	Equipment	per use	N/A	2023		1	0	0.065	1.00065	-1	0
India	2	Equipment - Manual Flow Reg	per use	4	2023	Buymedical.com	1	4	0.065	1.00065	-1	3.9974
India	3	Equipment - Infusion Pump	per use	2000	2023	diamedicalusa.com	1	2000	0.065	1.00065	-1	1998.7
India	4	Equipment - DripAssist	per use	300	2023	Shiftlabs	1	300	0.065	1.00065	-1	299.805
India	5	Equipment - DripAssist + Manual Flow Regulator	per use	304	2023	Shiftlabs	1	304	0.065	1.00065	-1	303.803
India	1	ICU Stay	per day	33.33	2013	Indian Society of Critical Care Medicine, 2013	3	99.99	0.065	1.00065	9	100.576
India	2	ICU Stay	per day	33.33	2013	Indian Society of Critical Care Medicine, 2013	3	99.99	0.065	1.00065	9	100.576
India	3	ICU Stay	per day	33.33	2013	Indian Society of Critical Care Medicine, 2013	3	99.99	0.065	1.00065	9	100.576
India	4	ICU Stay	per day	33.33	2013	Indian Society of Critical Care Medicine, 2013	3	99.99	0.065	1.00065	9	100.576
India	5	ICU Stay	per day	33.33	2013	Indian Society of Critical Care Medicine, 2013	3	99.99	0.065	1.00065	9	100.576
India	1	ICU Ventilator	per day	7.5	2022		1	7.5	0.065	1.00065	0	7.5
India	2	ICU Ventilator	per day	7.5	2022		1	7.5	0.065	1.00065	0	7.5
India	3	ICU Ventilator	per day	7.5	2022		1	7.5	0.065	1.00065	0	7.5
India	4	ICU Ventilator	per day	7.5	2022		1	7.5	0.065	1.00065	0	7.5
India	5	ICU Ventilator	per day	7.5	2022		1	7.5	0.065	1.00065	0	7.5
		** Senegal does not bill for ventilator use per day
		Total Costs per method per patient
			Senegal	India
		Method 1	411.767	110.036
		Method 2	409.558	113.26
		Method 3	2404.92	2108.16
		Method 4	707.757	410.57
		Method 5	711.854	414.631
